# Supplementary material
Source: PubMed Central journal article supplement (PMC3591950)
Supplement: AEM.03354-12_zam999104155so1.pdf [file AEM.03354-12_zam999104155so1.pdf]

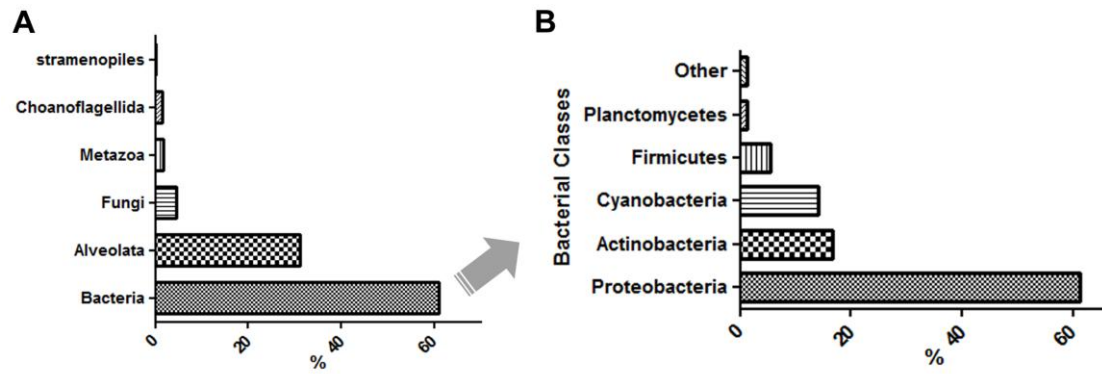

**Supplementary Figure S1: Taxonomical results of blast searches against non-redundant database from Genbank. Data correspond to contigs previously assigned as Eukaryote in MG-rast. A: Most abundant taxonomical groups. B: Expanded view of bacterial classes, normalized to the total of Bacteria.**
