# Supplementary material
Source: PubMed Central journal article supplement (PMC3591950)
Supplement: AEM.03354-12_zam999104155so3.pdf [file AEM.03354-12_zam999104155so3.pdf]

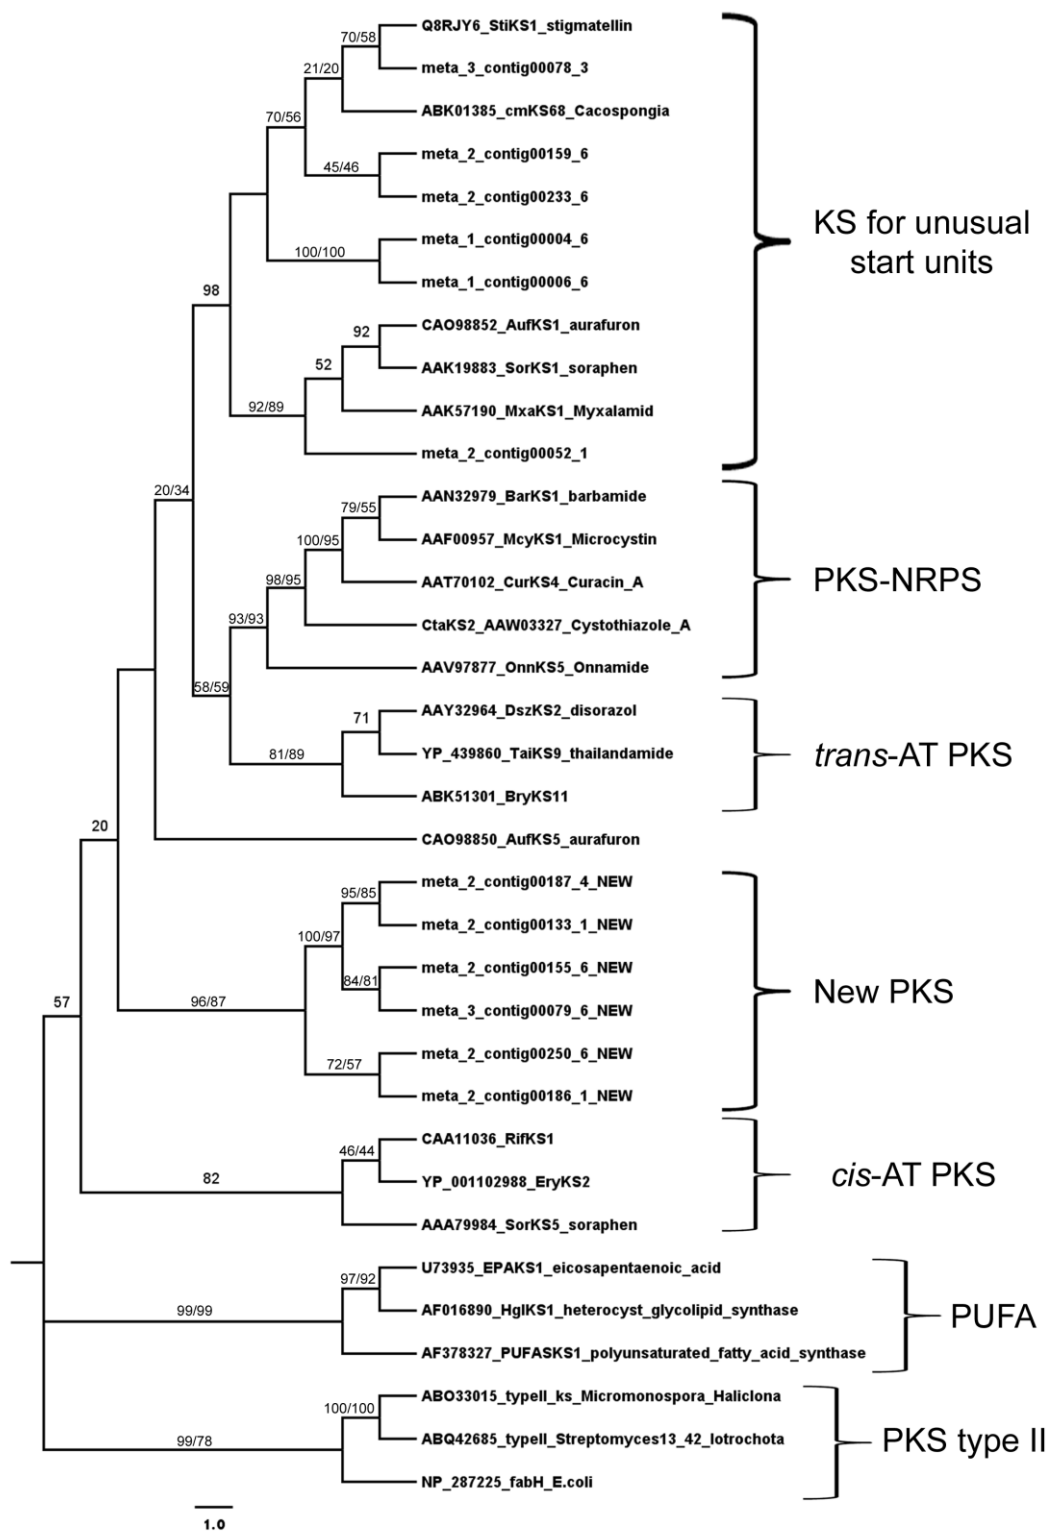

**Supplementary Figure S3: Phylogenetic association between the novel *A. brasiliensis*-exclusive PKS group and PKSs of known function.** The tree was constructed using Neighbor-Joining (NJ) and Maximum Likelihood (ML) methods. Numbers on the branches refer to NJ and ML bootstrap values (1,000 replicates and 100 replicates, respectively). The scale bar represents the substitutions/site.
