# Supplementary material
Source: PubMed Central journal article supplement (PMC3591950)
Supplement: AEM.03354-12_zam999104155so4.pdf [file AEM.03354-12_zam999104155so4.pdf]

Supplementary Table S1: Overview of the results of metagenomes before and after assembling and quality filtering

| Metagenomes Statistics                                             | Metagenomes    |                |                |
|--------------------------------------------------------------------|----------------|----------------|----------------|
|                                                                    | KS1            | KS2            | KS3            |
| <b>Upload</b>                                                      | 25,950         | 107,337        | 39,343         |
| <b>Post QC<sup>a</sup></b>                                         | 23,313         | 85,019         | 33,516         |
| <b>Size (nt)<sup>b</sup></b>                                       | 5,936,028      | 24,454,837     | 8,966,141      |
| <b>Mean seqs. Length (nt)<sup>b</sup></b>                          | 254 ± 99       | 287 ± 76       | 267 ± 75       |
| <b>Mean GC %<sup>b</sup></b>                                       | 56 ± 7         | 57 ± 6         | 58 ± 6         |
| <b>Classified ORG<sup>b,c</sup></b>                                | 55.94          | 86.17          | 83.95          |
| <b>Classified FCN<sup>b,c</sup></b>                                | 0.82           | 1.58           | 1.79           |
| <b>Number of contigs</b>                                           | 542            | 2,329          | 1,065          |
| <b>Aligned reads in contigs</b>                                    | 16,879 (0.65%) | 74,804 (69.7%) | 27,286 (69.4%) |
| <b>Singleton</b>                                                   | 7,597 (29.3%)  | 29,107 (27.1%) | 10,401 (26.4%) |
| <b>Short (&lt; nt)</b>                                             | 591 (2.3%)     | 1,517 (1.4%)   | 632 (1.6%)     |
| <b>Largest contig size (nt)</b>                                    | 687            | 818            | 693            |
| <b>Assembled Sequences used in the phylogenetic reconstruction</b> | 9 (1.6%)       | 167 (7.2%)     | 56 (5.2%)      |

<sup>a</sup> - QC – MG-RAST 3 quality control.

<sup>b</sup> - Values obtained considering the post QC.

<sup>c</sup> – Percentages obtained with post QC data and using  $1e^{-5}$ .

ORG – Organism; FCN – Function; Seqs. – Sequences.
