# Supplementary material
Source: PubMed Central journal article supplement (PMC3591950)
Supplement: AEM.03354-12_zam999104155so5.pdf [file AEM.03354-12_zam999104155so5.pdf]

Supplementary Table S2: Sequences used in phylogenies and their Microbe-BLAST results. Highlighted sequences are those with greater identity scores in the PKS subtypes that they belong (excluding reference-sequences).

|            | Genbank<br>Accession<br>Number | Sequence                 | Microbe-BLAST hit                    |                | Identity<br>of the<br>best score |
|------------|--------------------------------|--------------------------|--------------------------------------|----------------|----------------------------------|
|            |                                |                          | Genome                               | Phylum         |                                  |
| <b>Sup</b> |                                |                          |                                      |                |                                  |
| 1          | ABK01356                       | A_aerophoba_27p20        | Mycobacterium gilvum PYR-GCK CCG.    | Actinobacteria | 66%                              |
| 2          | ABK01354                       | A_aerophoba_22b24        | Mycobacterium gilvum PYR-GCK CCG     | Actinobacteria | 67%                              |
| 3          | ABK01355                       | A_aerophoba_26p15        | Mycobacterium gilvum PYR-GCK CCG.    | Actinobacteria | 62%                              |
| 4          | AAW84190                       | spTKS62g_D_dissoluta     | Mycobacterium_sp._Spir1              | Actinobacteria | 65%                              |
| 5          | AAW84230                       | fosFJ58KS2_D_dissoluta   | Mycobacterium_sp._Spir1              | Actinobacteria | 63%                              |
| 6          | AAW84206                       | spTKS15Ci_D_dissoluta    | Mycobacterium_gilvum_PYR-GCK         | Actinobacteria | 67%                              |
| 7          | ABK01329                       | C_mycofijiensis_cm5KS6   | Mycobacterium vanbaalenii PYR-1 CCG  | Actinobacteria | 67%                              |
| 8          | AAW84181                       | spUKS40i_D_dissoluta     | Mycobacterium vanbaalenii PYR-1 CCG  | Actinobacteria | 66%                              |
| 9          | ABK01399                       | A_aerophoba_Aa23         | Mycobacterium gilvum PYR-GCK CCG     | Actinobacteria | 55%                              |
| 10         | ABK01370                       | A_aerophoba_23           | Mycobacterium gilvum PYR-GCK CCG     | Actinobacteria | 55%                              |
| 11         | ABK01381                       | C_mycofijiensis_cmKS20   | Mycobacterium_sp._Spir1              | Actinobacteria | 67%                              |
| 12         | AAW84184                       | spUKS52g_D_dissoluta     | Mycobacterium gilvum PYR-GCK CCG     | Actinobacteria | 67%                              |
| 13         | ACX49735                       | SupA_KS13                | Mycobacterium gilvum PYR-GCK CCG.    | Actinobacteria | 67%                              |
| 14         | AAW84201                       | spTKS39Bg_D_dissoluta    | Mycobacterium_sp._Spir1              | Actinobacteria | 68%                              |
| 15         | AAW84227                       | fosUH105KS68_D_dissoluta | Mycobacterium vanbaalenii PYR-1 CCG. | Actinobacteria | 68%                              |
| 16         | ABK01336                       | C_mycofijiensis_cmKS41   | Mycobacterium vanbaalenii PYR-1 CCG  | Actinobacteria | 64%                              |
| 17         | AAW84185                       | spUKS41Ai_D_dissoluta    | Mycobacterium vanbaalenii PYR-1 CCG  | Actinobacteria | 65%                              |
| 18         | ABK01400                       | A_aerophoba_Aa40         | Mycobacterium vanbaalenii PYR-1 CCG  | Actinobacteria | 67%                              |
| 19         | ABK01363                       | A_aerophoba_40           | Mycobacterium vanbaalenii PYR-1 CCG  | Actinobacteria | 67%                              |
| 20         | ABK01369                       | A_aerophoba_21           | Mycobacterium vanbaalenii PYR-1 CCG  | Actinobacteria | 67%                              |
| 21         | ABK01360                       | A_aerophoba_Aa21         | Mycobacterium vanbaalenii PYR-1 CCG  | Actinobacteria | 65%                              |

|    |          |                          |                                         |                     |     |
|----|----------|--------------------------|-----------------------------------------|---------------------|-----|
| 22 | ABK01365 | A_aerophoba_2            | Mycobacterium vanbaalenii PYR-1 CCG     | Actinobacteria      | 67% |
| 23 | ABK01358 | A_aerophoba_Aa2          | Mycobacterium vanbaalenii PYR-1 CCG     | Actinobacteria      | 65% |
| 24 | ABK01361 | A_aerophoba_Aa32         | Mycobacterium vanbaalenii PYR-1 CCG     | Actinobacteria      | 64% |
| 25 | ABK01372 | A_aerophoba_32           | Mycobacterium vanbaalenii PYR-1 CCG     | Actinobacteria      | 67% |
| 26 | AAW84219 | fosFJ104KS51_D_dissoluta | Mycobacterium smegmatis str. MC2 155 CG | Actinobacteria      | 67% |
| 27 | ABK01337 | C_mycofijiensis_cmKSB48  | Mycobacterium vanbaalenii PYR-1 CCG     | Actinobacteria      | 66% |
| 28 | AAW84179 | spUKS13g_D_dissoluta     | Gamma proteobacterium HdN1 CG.          | Gammaproteobacteria | 58% |
| 29 | ABK01364 | A_aerophoba_1            | Gamma proteobacterium HdN1 CG.          | Gammaproteobacteria | 57% |
| 30 | ABK01352 | A_aerophoba_16e14        | Gamma proteobacterium HdN1 CG.          | Gammaproteobacteria | 56% |
| 31 | ABK01357 | A_aerophoba_Aa1          | Gamma proteobacterium HdN1 CG           | Gammaproteobacteria | 50% |
| 32 | AAW84204 | spTKS12Ci_D_dissoluta    | Mycobacterium vanbaalenii PYR-1 CCG     | Actinobacteria      | 68% |
| 33 | AAW84231 | cosTM26KS21_D_dissoluta  | Mycobacterium vanbaalenii PYR-1 CCG.    | Actinobacteria      | 70% |
| 34 | ABK01351 | A_aerophoba_15p20        | Stigmatella_aurantiaca_DW4/3-1          | Deltaproteobacteria | 61% |
| 35 | ABK01350 | A_aerophoba_1h11         | Stigmatella_aurantiaca_DW4/3-1          | Deltaproteobacteria | 61% |
| 36 | ABK01367 | A_aerophoba_pgpk16       | Stigmatella_aurantiaca_DW4/3-1          | Deltaproteobacteria | 61% |
| 37 | ABK01378 | X_muta14                 | Mycobacterium gilvum PYR-GCK CCG        | Actinobacteria      | 63% |
| 38 | AAW84223 | fosFK57KS57_D_dissoluta  | Stigmatella_aurantiaca_DW4/3-1          | Deltaproteobacteria | 62% |
| 39 | ABK01368 | A_aerophoba_20           | Myxococcus_fulvus_HW-1 CG.              | Deltaproteobacteria | 63% |
| 40 | ABK01359 | A_aerophoba_Aa20         | Myxococcus fulvus HW-1 CCG.             | Deltaproteobacteria | 63% |
| 41 | ABK01373 | A_aerophoba_aapgpk7      | Myxococcus fulvus HW-1 CCG.             | Deltaproteobacteria | 63% |
| 42 | ABK01376 | A_cavernicola_22         | Granulicella_mallensis_MP5ACTX8 CCG     | Acidobacteria       | 59% |
| 43 | ABK01375 | P_crassa_7               | Mycobacterium vanbaalenii PYR-1 CCG     | Actinobacteria      | 64% |
| 44 | AAW84202 | spTKS55Bg_D_dissoluta    | Mycobacterium vanbaalenii PYR-1 CCG     | Actinobacteria      | 64% |
| 45 | AAW84205 | spTKS14Ci_D_dissoluta    | Mycobacterium vanbaalenii PYR-1 CCG     | Actinobacteria      | 65% |
| 46 | ABK01377 | P_crassa_8               | Mycobacterium vanbaalenii PYR-1 CCG     | Actinobacteria      | 65% |
| 47 | AAW84189 | spTKS54g_D_dissoluta     | Mycobacterium vanbaalenii PYR-1 CCG     | Actinobacteria      | 65% |
| 48 | ABK01396 | T_swinhoei_swsymb1       | Mycobacterium vanbaalenii PYR-1 CCG     | Actinobacteria      | 63% |
| 49 | ABK01374 | V_gigantea_4             | Mycobacterium vanbaalenii PYR-1 CCG.    | Actinobacteria      | 66% |

|    |          |                         |                                      |                     |     |
|----|----------|-------------------------|--------------------------------------|---------------------|-----|
| 50 | AAY00027 | SupAKS14                | Mycobacterium vanbaalenii PYR-1 CCG  | Actinobacteria      | 69% |
| 51 | ABK01347 | T_swinhoei_swsymb13     | Gamma_proteobacterium_HdN1 CCG       | Gammaproteobacteria | 57% |
| 52 | ABB73281 | P_clavata_2368H         | Mycobacterium sp. MCS CCG.           | Actinobacteria      | 55% |
| 53 | ABK01349 | T_swinhoei_swsymb19     | Mycobacterium vanbaalenii PYR-1 CCG  | Actinobacteria      | 61% |
| 54 | JX012429 | meta_2_contig00196_1    | Gamma_proteobacterium_HdN1 CG        | Gammaproteobacteria | 54% |
| 55 | ABK01338 | C_mycofijiensis_cmKSB56 | Gamma_proteobacterium_HdN1 CG        | Gammaproteobacteria | 58% |
| 56 | ABB73280 | P_clavata__2368C        | Mycobacterium vanbaalenii PYR-1 CCG  | Actinobacteria      | 62% |
| 57 | ABK01348 | T_swinhoei_swsymb14     | Gamma proteobacterium HdN1 CG        | Gammaproteobacteria | 58% |
| 58 | AAQ91805 | AAQ91805                | Gamma proteobacterium HdN1 CG        | Gammaproteobacteria | 58% |
| 59 | AAQ91804 | AAQ91804                | Mycobacterium vanbaalenii PYR-1 CCG  | Actinobacteria      | 62% |
| 60 | ABB73277 | P_clavata_pcks29        | Gamma proteobacterium HdN1 CG        | Gammaproteobacteria | 60% |
| 61 | ABK01345 | T_swinhoei_swsymb6      | Mycobacterium vanbaalenii PYR-1 CCG  | Actinobacteria      | 60% |
| 62 | ABK01335 | C_mycofijiensis_cmKS13  | Gamma proteobacterium HdN1 CG        | Gammaproteobacteria | 58% |
| 63 | ABB73279 | P_clavata_2226A         | Mycobacterium vanbaalenii PYR-1 CCG  | Actinobacteria      | 60% |
| 64 | ABB73276 | P_clavata_pcks17        | Gamma proteobacterium HdN1 CG        | Gammaproteobacteria | 55% |
| 65 | ABK01332 | C_mycofijiensis_cmKS2   | Acidobacterium_capsulatum_ATCC_51196 | Acidobacteria       | 47% |
| 66 | AAW84183 | spUKS44i_D_dissoluta    | Gamma proteobacterium HdN1 CG        | Gammaproteobacteria | 59% |
| 67 | ABK01341 | T_swinhoei_swsymb3      | Mycobacterium vanbaalenii PYR-1 CCG  | Actinobacteria      | 51% |
| 68 | ABB73278 | P_clavata_2125E         | Mycobacterium vanbaalenii PYR-1 CCG  | Actinobacteria      | 54% |
| 69 | ABK01344 | T_swinhoei_swsymb11     | Mycobacterium vanbaalenii PYR-1 CCG  | Actinobacteria      | 54% |
| 70 | ABK01328 | C_mycofijiensis_cm5KS5  | Microcystis aeruginosa NIES-843 CG   | Cyanobacteria       | 48% |
| 71 | ABB73275 | P_clavata_pcks38        | Myxococcus xanthus DK 1622 CCG       | Deltaproteobacteria | 51% |
| 72 | AAQ91802 | AAQ91802                | Acidobacterium_capsulatum_ATCC       | Acidobacteria       | 51% |
| 73 | ABK01327 | C_mycofijiensis_cm5KS4  | Mycobacterium vanbaalenii PYR-1 CCG  | Actinobacteria      | 52% |
| 74 | ABK01342 | T_swinhoei_swsymb4      | Mycobacterium vanbaalenii PYR-1 CCG  | Actinobacteria      | 63% |
| 75 | ABK01334 | C_mycofijiensis_cmKS9   | Gamma proteobacterium HdN1 CG        | Gammaproteobacteria | 54% |
| 76 | ABK01339 | C_mycofijiensis_cmKSH22 | Mycobacterium vanbaalenii PYR-1 CCG  | Actinobacteria      | 59% |
| 77 | AAW84193 | spTKS71i_D_dissoluta    | Mycobacterium vanbaalenii PYR-1 CCG  | Actinobacteria      | 59% |

|     |          |                          |                                             |                     |     |
|-----|----------|--------------------------|---------------------------------------------|---------------------|-----|
| 78  | AAQ91807 | AAQ91807                 | Mycobacterium vanbaalenii PYR-1 CCG         | Actinobacteria      | 61% |
| 79  | AAQ91806 | AAQ91806                 | Mycobacterium vanbaalenii PYR-1 CCG         | Actinobacteria      | 62% |
| 80  | ABK01346 | T_swinhoei_swsymb12      | Mycobacterium vanbaalenii PYR-1 CCG.        | Actinobacteria      | 61% |
| 81  | ABK01397 | T_swinhoei_swsymb5       | Acidobacterium capsulatum ATCC 51196 CG.    | Acidobacteria       | 59% |
| 82  | ABB73273 | ABB73273                 | Burkholderia_ambifaria_AMMD                 | Betaproteobacteria  | 56% |
| 83  | ABB73274 | ABB73274                 | Acidobacterium_capsulatum_ATCC              | Acidobacteria       | 60% |
| 84  | AAQ91803 | AAQ91803                 | Mycobacterium vanbaalenii PYR-1 CCG         | Actinobacteria      | 63% |
| 85  | ABK01331 | C_mycofijiensis_cm5KS7   | Nostoc_punctiforme_PCC_73102                | Cyanobacteria       | 52% |
| 86  | AAW84182 | spUKS42i_D_dissoluta     | Nostoc_punctiforme_PCC_73102                | Cyanobacteria       | 52% |
| 87  | ABK01343 | T_swinhoei_swsymb8       | Mycobacterium vanbaalenii PYR-1 CCG         | Actinobacteria      | 55% |
| 88  | ABK01340 | C_mycofijiensis_cmKSH39  | Opitutus terrae PB90-1 CCG                  | Verrucomicrobia     | 58% |
| 89  | ABK01326 | C_mycofijiensis_cm5KS3   | Opitutus terrae PB90-1 CCG.                 | Verrucomicrobia     | 56% |
| 90  | AAW84199 | spTKS32Bi_D_dissoluta    | Mycobacterium gilvum PYR-GCK CCG            | Actinobacteria      | 67% |
| 91  | ACX49735 | SupA_KS23                | Mycobacterium vanbaalenii PYR-1 CCG         | Actinobacteria      | 63% |
| 92  | AAW84226 | fosUH45KS32_D_dissoluta  | Methylobacterium sp. 4-46 CCG.              | Alphaproteobacteria | 61% |
| 93  | AAW84180 | spUKS25i_D_dissoluta     | Mycobacterium vanbaalenii PYR-1 CCG         | Actinobacteria      | 61% |
| 94  | AAW84200 | spTKS35Bg_D_dissoluta    | Mycobacterium vanbaalenii PYR-1 CCG         | Actinobacteria      | 58% |
| 95  | AAW84228 | fosUH124KS91_D_dissoluta | Mycobacterium vanbaalenii PYR-1 CCG         | Actinobacteria      | 58% |
| 96  | ABK01398 | A_aerophoba_Aa5          | Mycobacterium_sp._Spir1 CCG.                | Actinobacteria      | 61% |
| 97  | ABK01371 | A_aerophoba_24           | Mycobacterium_sp._Spir1 CCG.                | Actinobacteria      | 60% |
| 98  | AAW84218 | fosFJ16KS31_D_dissoluta  | Mycobacterium vanbaalenii PYR-1 CCG         | Actinobacteria      | 60% |
| 99  | JX012430 | meta_2_contig00100_1     | Mycobacterium_sp._Spir1 CCG                 | Actinobacteria      | 63% |
| 100 | AAW84188 | spTKS48g_D_dissoluta     | Mycobacterium vanbaalenii PYR-1 CCG.        | Actinobacteria      | 50% |
| 101 | AAQ91799 | AAQ91799                 | Mycobacterium gilvum PYR-GCK CCG            | Actinobacteria      | 49% |
| 102 | ABK01330 | C_mycofijiensis_cm5AKS6  | Mycobacterium_sp._Spir1 CCG                 | Actinobacteria      | 56% |
| 103 | AAW84229 | fosUF104KS49_D_dissoluta | Mycobacterium_intracellulare_MOTT-64        | Actinobacteria      | 61% |
| 104 | AAW84214 | cosTM40KS52_D_dissoluta  | Mycobacterium vanbaalenii PYR-1 CCG         | Actinobacteria      | 62% |
| 105 | AAW84215 | cosTM109KS3_D_dissoluta  | Mycobacterium_avium_subsp._paratuberculosis | Actinobacteria      | 55% |

|                            |                 |                               |                                                  |                       |            |
|----------------------------|-----------------|-------------------------------|--------------------------------------------------|-----------------------|------------|
| 106                        | AAY00027        | SupA15                        | Mycobacterium vanbaalenii PYR-1 CCG.             | Actinobacteria        | 69%        |
| <b>107</b>                 | <b>AAW84225</b> | <b>fosUF15KS6_D_dissoluta</b> | <b>Mycobacterium vanbaalenii PYR-1 CCG</b>       | <b>Actinobacteria</b> | <b>72%</b> |
| 108                        | AAW84224        | fosUF3KS2_D_dissoluta         | Mycobacterium vanbaalenii PYR-1 CCG.             | Actinobacteria        | 69%        |
| 109                        | AAY00025        | SupAKS5                       | Mycobacterium_avium_subsp._paratuberculosis      | Actinobacteria        | 68%        |
| 110                        | AAY00025        | SupAKS4                       | Mycobacterium_gilvum_PYR-GCK                     | Actinobacteria        | 70%        |
| 111                        | AAY00025        | SupAKS8                       | Mycobacterium_avium                              | Actinobacteria        | 69%        |
| 112                        | AAY00025        | SupAKS7                       | Mycobacterium_avium_subsp._paratuberculosis      | Actinobacteria        | 70%        |
| 113                        | AAY00025        | SupAKS3                       | Mycobacterium_gilvum_PYR-GCK                     | Actinobacteria        | 68%        |
| 114                        | AAY00025        | SupAKS12                      | Mycobacterium vanbaalenii PYR-1 CCG.             | Actinobacteria        | 70%        |
| 115                        | AAY00025        | SupAKS11                      | Mycobacterium_sp._Spir1, CG                      | Actinobacteria        | 65%        |
| 116                        | AAY00025        | SupA_KS13                     | Mycobacterium gilvum PYR-GCK CCG.                | Actinobacteria        | 67%        |
| 117                        | AAY00025        | SupAKS9                       | Mycobacterium gilvum PYR-GCK CCG.                | Actinobacteria        | 70%        |
| 118                        | AAY00025        | SupAKS6                       | Mycobacterium avium 104, CG                      | Actinobacteria        | 69%        |
| 119                        | AAW84213        | cosTM31KS65__D_dissoluta      | Mycobacterium gilvum PYR-GCK CCG.                | Actinobacteria        | 61%        |
| 120                        | AAY00025        | SupAKS10                      | Mycobacterium gilvum PYR-GCK CCG.                | Actinobacteria        | 67%        |
| 121                        | AAY00025        | SupAKS1                       | Mycobacterium gilvum PYR-GCK CCG.                | Actinobacteria        | 67%        |
| 122                        | AAY00025        | SupAKS0                       | Mycobacterium gilvum PYR-GCK CCG.                | Actinobacteria        | 70%        |
| 123                        | AAW84212        | cosTM11KS1_D_dissoluta        | Mycobacterium gilvum PYR-GCK CCG.                | Actinobacteria        | 70%        |
| 124                        | ABK01392        | ABK01392                      | Mycobacterium_avium_subsp._paratuberculosis      | Actinobacteria        | 62%        |
| <b>FAS</b>                 |                 |                               |                                                  |                       |            |
| 125                        | NP_218342       | PKS2_KS4                      | Mycobacterium tuberculosis KZN 1435 CG           | Actinobacteria        | 99%        |
| 126                        | NP855206        | NP855206                      | Mycobacterium tuberculosis T17 cont1.179, WGSS   | Actinobacteria        | 100%       |
| 127                        | NP216043        | pks5_KS4                      | Mycobacterium africanum GM041182 CCG.            | Actinobacteria        | 99%        |
| 128                        | NP217456        | NP217456                      | Mycobacterium tuberculosis GM 1503 cont1198 WGSS | Actinobacteria        | 90%        |
| <b>Cis-AT (dark green)</b> |                 |                               |                                                  |                       |            |
| 129                        | YP259894        | <b>PltKS1_Pseudomo</b>        | Pseudomonas fluorescens Pf-5 chromosome, CG      | Gammaproteobacteria   | 100%       |
| 130                        | AAW84176        | spFKS81i_D_dissoluta          | Nostoc punctiforme PCC 73102 CG.                 | Cyanobacteria         | 62%        |
| 131                        | JX012555        | meta_2_contig00151_6          | Myxococcus_fulvus_HW-1                           | Deltaproteobacteria   | 63%        |

|     |            |                             |                                                  |                     |      |
|-----|------------|-----------------------------|--------------------------------------------------|---------------------|------|
| 132 | AAW84174   | spFKS53g_D_dissoluta        | Anabaena variabilis ATCC 29413 CCG.              | Cyanobacteria       | 50%  |
| 133 | AAW84220   | fosFJ13059_D_dissoluta      | Cyanothece_sp._ATCC_51142                        | Cyanobacteria       | 66%  |
| 134 | JX012550   | meta_2_contig00117_4        | Anabaena_variabilis_ATCC_29413 CG                | Cyanobacteria       | 75%  |
| 135 | AAW84169   | spFKS31g_D_dissoluta        | Anabaena variabilis ATCC 29413 CCG               | Cyanobacteria       | 64%  |
| 136 | CAD19087   | <b>StiKS2_Myxo</b>          | Nostoc_sp._PCC_7120 CG                           | Cyanobacteria       | 66%  |
| 137 | JX012436   | meta_2_contig00158_1        | Microcystis aeruginosa NIES-843 CG               | Cyanobacteria       | 71%  |
| 138 | AAW84197   | spTKS10Bi_D_dissoluta       | Microcystis aeruginosa NIES-843 CG.              | Cyanobacteria       | 67%  |
| 139 | JX012434   | meta_2_contig00032_1        | Nostoc punctiforme PCC 73102 CG                  | Cyanobacteria       | 65%  |
| 140 | AAW84191   | AAW84191                    | Nostoc punctiforme PCC 73102 CG                  | Cyanobacteria       | 60%  |
| 141 | JX012444   | meta_2_contig00162_3        | Cyanothece sp. ATCC 51142 chromosome circular CS | Cyanobacteria       | 64%  |
| 142 | AF183408_7 | <b>McyKS3_Cyano</b>         | Microcystis aeruginosa NIES-843 chromosome, CG   | Cyanobacteria       | 100% |
| 143 | ABI34078   | H_perleve                   | Planctomyces brasiliensis DSM 5305 CCG.          | Planctomycetes      | 99%  |
| 144 | AAW84196   | spTKS42Ai_D_dissoluta       | Cyanothece sp. ATCC 51142 chromosome circular CS | Cyanobacteria       | 73%  |
| 145 | AAW84186   | spTKS36g_D_dissoluta        | Nostoc punctiforme PCC 73102 CG.                 | Cyanobacteria       | 77%  |
| 146 | AAW84187   | spTKS38g_D_dissoluta        | Stigmatella_aurantiaca_DW4/3-1 CG.               | Deltaproteobacteria | 60%  |
| 147 | JX012545   | meta_2_contig00026_6        | Nostoc_punctiforme_PCC_73102 CCG                 | Cyanobacteria       | 62%  |
| 148 | ABK01383   | C_mycofijiensis_cmKS31      | Nostoc punctiforme PCC 73102 CG                  | Cyanobacteria       | 59%  |
| 149 | JX012569   | meta_2_contig00028_4        | Burkholderia glumae BGR1 plasmid bglu_2p CS      | Betaproteobacteria  | 57%  |
| 150 | JX012445   | meta_2_contig00058_1        | Stigmatella_aurantiaca_DW4/3-1                   | Deltaproteobacteria | 53%  |
| 151 | JX012448   | meta_2_contig00048_1        | Burkholderia glumae BGR1 plasmid bglu_2p CS      | Betaproteobacteria  | 59%  |
| 152 | ABI91465   | Burkholderia_ambifaria_AMMD | Burkholderia_ambifaria AMMD chromosome 3 CS      | Betaproteobacteria  | 91%  |
| 153 | ABB73269   | P_clavata_F16               | Actinoplanes_sp._SE50/110                        | Actinobacteria      | 60%  |
| 154 | AAA79984   | <b>SorKS5_Sorangium</b>     | Haliangium ochraceum DSM 14365 chromosome, CG    | Deltaproteobacteria | 75%  |
| 155 | JX012537   | meta_2_contig00030_6        | Nostoc_punctiforme_PCC_73102                     | Cyanobacteria       | 66%  |
| 156 | AAW84210   | spTKS42Ci_D_dissoluta       | Stigmatella_aurantiaca_DW4/3-1                   | Deltaproteobacteria | 69%  |
| 157 | AAW84216   | fosFJ4KS21_D_dissoluta      | Nostoc punctiforme PCC 73102 CG.                 | Cyanobacteria       | 67%  |
| 158 | JX012540   | meta_2_contig00163_6        | Gamma proteobacterium HdN1 CG.                   | Gammaproteobacteria | 70%  |
| 159 | AAT68462   | Salinospora_M413_Pclavata   | Salinispora arenicola CNS-205 CCG                | Actinobacteria      | 89%  |

|     |              |                            |                                               |                     |      |
|-----|--------------|----------------------------|-----------------------------------------------|---------------------|------|
| 160 | AAT68460     | Salinospora_M403_Pclavata  | Salinispota arenicola CNS-205 CCG             | Actinobacteria      | 89%  |
| 161 | AAT68461     | Salinospora_M412_Pclavata  | Salinispota arenicola CNS-205 CCG             | Actinobacteria      | 90%  |
| 162 | AAT68463     | Salinospora_SW15_Pclavata  | Salinispota arenicola CNS-205 CCG.            | Actinobacteria      | 81%  |
| 163 | AAT68464     | Salinospora_SW17_Pclavata  | Salinispota arenicola CNS-205 CCG.            | Actinobacteria      | 87%  |
| 164 | CAA11036     | <b>RifKS2_Actino</b>       | Amycolatopsis mediterranei U32 chromosome, CG | Actinobacteria      | 99%  |
| 165 | ADN37744     | MycobactFSD4bSM_10_Fasc    | Mycobacterium avium 104 CG.                   | Actinobacteria      | 80%  |
| 166 | JX012638     | meta_3_contig00018_6       | Streptomyces_griseus_subsp._griseus           | Actinobacteria      | 68%  |
| 167 | YP_001102988 | <b>EryKS2_Actino</b>       | Saccharopolyspora erythraea NRRL 2338 WGSS    | Actinobacteria      | 100% |
| 168 | ADN37743     | MycobactFSD4bSM_6_Fasc     | Mycobacterium marinum M CG                    | Actinobacteria      | 69%  |
| 169 | AAC46024     | <b>NidKS2_Streptomyces</b> | Saccharopolyspora erythraea                   | Actinobacteria      | 82%  |
| 170 | JX012513     | meta_3_contig00055_3       | Streptomyces_violaceusniger_Tu_4113           | Actinobacteria      | 77%  |
| 171 | ABB73268     | P_clavata_Rhodococcus      | Rhodococcus jostii RHA1 CCG.                  | Actinobacteria      | 91%  |
| 172 | JX012561     | meta_2_contig00168_4       | Mycobacterium marinum M CG.                   | Actinobacteria      | 82%  |
| 173 | ADN37742     | MycobactFSD4bSM_4_Fasc     | Streptomyces_violaceusniger_Tu_4113           | Actinobacteria      | 63%  |
| 174 | JX012508     | meta_3_contig00031_1       | Streptomyces_bingchenggensis_BCW-1 CCG.       | Actinobacteria      | 76%  |
| 175 | JX012634     | meta_3_contig00028_4       | Streptomyces_bingchenggensis_BCW-1 CCG.       | Actinobacteria      | 73%  |
| 176 | JX012443     | meta_2_contig00043_1       | Streptomyces_bingchenggensis_BCW-1 CCG.       | Actinobacteria      | 74%  |
| 177 | JX012509     | meta_3_contig00025_1       | Streptomyces_bingchenggensis_BCW-1 CCG.       | Actinobacteria      | 73%  |
| 178 | JX012558     | meta_2_contig00099_4       | Streptomyces_griseus_subsp._griseus           | Actinobacteria      | 73%  |
| 179 | JX012573     | meta_2_contig00205_4       | Streptomyces_avermitilis_MA-4680              | Actinobacteria      | 74%  |
| 180 | JX012456     | meta_2_contig00245_1       | Streptomyces_coelicolor_A3                    | Actinobacteria      | 61%  |
| 181 | JX012635     | meta_3_contig00024_4       | Streptomyces_avermitilis_MA-4680 CCG.         | Actinobacteria      | 64%  |
| 182 | JX012464     | meta_2_contig00224_3       | Stigmatella_aurantiaca_DW4/3-1                | Deltaproteobacteria | 56%  |
| 183 | ABK01388     | C_mycofijiensis_cmKSA11    | Nostoc punctiforme PCC 73102 CG.              | Cyanobacteria       | 64%  |
| 184 | JX012631     | meta_3_contig00033_5       | Opitutus terrae PB90-1 CCG                    | Verrucomicrobia     | 65%  |
| 185 | JX012438     | meta_2_contig00025_1       | Opitutus terrae PB90-1 CCG                    | Verrucomicrobia     | 65%  |
| 186 | JX012446     | meta_2_contig00031_1       | Myxococcus_fulvus_HW-1 CCG                    | Deltaproteobacteria | 59%  |
| 187 | ABK01390     | C_mycofijiensis_cmKSA61    | Stigmatella_aurantiaca_DW4/3-1                | Deltaproteobacteria | 66%  |

|                               |                 |                             |                                                  |                       |            |
|-------------------------------|-----------------|-----------------------------|--------------------------------------------------|-----------------------|------------|
| 188                           | AF210843_18     | <b>EpoKS2_Myxo</b>          | Myxococcus xanthus DK 1622 chromosome, CG        | Deltaproteobacteria   | 100%       |
| 189                           | AAW84222        | fosFK9KS4_D_dissoluta       | Stigmatella_aurantiaca_DW4/3-1                   | Deltaproteobacteria   | 64%        |
| <b>Cis-AT 1 (light green)</b> |                 |                             |                                                  |                       |            |
| 190                           | JX012626        | meta_3_contig00009_6        | Microcystis aeruginosa NIES-843 CG.              | Cyanobacteria         | 72%        |
| 191                           | JX012536        | meta_2_contig00040_5        | Microcystis aeruginosa NIES-843 CG.              | Cyanobacteria         | 72%        |
| 192                           | JX012542        | meta_2_contig00035_5        | Nostoc punctiforme PCC 73102 CG.                 | Cyanobacteria         | 59%        |
| 193                           | JX012435        | meta_2_contig00088_3        | Nostoc punctiforme PCC 73102 CG                  | Cyanobacteria         | 71%        |
| 194                           | AAW84211        | spTKS43Ci_D_dissoluta       | Nostoc punctiforme PCC 73102 CG.                 | Cyanobacteria         | 65%        |
| 195                           | JX012538        | meta_2_contig00020_6        | Nostoc punctiforme PCC 73102 CG.                 | Cyanobacteria         | 68%        |
| 196                           | AAW84175        | spFKS69i_D_dissoluta        | Cyanothece sp. ATCC 51142 chromosome circular CS | Cyanobacteria         | 78%        |
| 197                           | ACI32874        | FAS_Streptomyces_H_simulans | Cyanothece sp. ATCC 51142 chromosome circular CS | Cyanobacteria         | 65%        |
| 198                           | JX012544        | meta_2_contig00074_4        | Mycobacterium_intracellulare_MOTT-64             | Actinobacteria        | 68%        |
| 199                           | ABK01382        | C_mycofijiensis_cmKS25      | Mycobacterium_sp._JLS                            | Actinobacteria        | 64%        |
| 200                           | JX012549        | meta_2_contig00171_5        | Stigmatella_aurantiaca_DW4/3-1                   | Deltaproteobacteria   | 72%        |
| 201                           | JX012630        | meta_3_contig00038_4        | Cyanothece_sp._ATCC_51142                        | Cyanobacteria         | 63%        |
| 202                           | JX012439        | meta_2_contig00046_2        | Nostoc punctiforme PCC 73102 CG                  | Cyanobacteria         | 58%        |
| <b>203</b>                    | <b>ADN37741</b> | <b>A_queenslandica</b>      | <b>Mycobacterium vanbaalenii PYR-1 CCG.</b>      | <b>Actinobacteria</b> | <b>93%</b> |
| 204                           | ADN37739        | A_queenslandica             | Mycobacterium vanbaalenii PYR-1 CCG.             | Actinobacteria        | 91%        |
| 205                           | AAW84178        | spFKS10Ai_D_dissoluta       | Nostoc punctiforme PCC 73102 CG.                 | Cyanobacteria         | 63%        |
| 206                           | JX012556        | meta_2_contig00189_4        | Rhodopirellula baltica SH 1 CCG.                 | Planctomycetes        | 63%        |
| 207                           | JX012619        | meta_2_contig00054_4        | Streptomyces_violaceusniger_Tu_4113              | Actinobacteria        | 50%        |
| 208                           | JX012440        | meta_2_contig00164_1        | Nostoc sp. PCC 7120 CG                           | Cyanobacteria         | 66%        |
| 209                           | ADN37738        | A_queenslandica             | Mycobacterium sp. Spyr1 CCG.                     | Actinobacteria        | 87%        |
| 210                           | ADN37737        | A_queenslandica             | Mycobacterium sp. Spyr1 CCG.                     | Actinobacteria        | 90%        |
| 211                           | JX012539        | meta_2_contig00016_6        | Hahella_chejuensis_KCTC_2396                     | Gammaproteobacteria   | 65%        |
| 212                           | JX012447        | meta_2_contig00214_2        | Granulicella_mallensis_MP5ACTX8 CG.              | Acidobacteria         | 66%        |
| 213                           | AAW84209        | spTKS39Ci_D_dissoluta       | Gamma_proteobacterium_HdN1 CCG.                  | Gammaproteobacteria   | 69%        |
| 214                           | JX012629        | meta_3_contig00059_6        | Cyanothece sp. ATCC 51142 chromosome circular CS | Cyanobacteria         | 73%        |



|                |          |                      |                                                  |                     |     |
|----------------|----------|----------------------|--------------------------------------------------|---------------------|-----|
| 215            | JX012431 | meta_2_contig00086_1 | Cyanothece sp. ATCC 51142 chromosome circular CS | Cyanobacteria       | 73% |
| 216            | JX012548 | meta_2_contig00295_6 | Anabaena variabilis ATCC 29413 chromosome, CG    | Cyanobacteria       | 76% |
| 217            | JX012442 | meta_2_contig00057_1 | Anabaena_variabilis_ATCC_29413                   | Cyanobacteria       | 65% |
| 218            | ACI32875 | ACI32875             | Cyanothece sp. ATCC 51142 chromosome circular CS | Cyanobacteria       | 63% |
| 219            | AAW84172 | spFKS44g_D_dissoluta | Nostoc punctiforme PCC 73102 CG.                 | Cyanobacteria       | 69% |
| 220            | AAW84168 | spFKS29g_D_dissoluta | Anabaena variabilis ATCC 29413 CCG.              | Cyanobacteria       | 69% |
| 221            | JX012455 | meta_2_contig00191_3 | Nostoc punctiforme PCC 73102 CG.                 | Cyanobacteria       | 67% |
| 222            | JX012554 | meta_2_contig00049_6 | Coralloccoccus_coralloides_DSM_2259 CCG          | Deltaproteobacteria | 59% |
| 223            | JX012437 | meta_2_contig00038_1 | Anabaena_variabilis_ATCC_29413 CCG.              | Deltaproteobacteria | 70% |
| 224            | JX012627 | meta_3_contig00021_6 | Nostoc punctiforme PCC 73102 CG                  | Cyanobacteria       | 68% |
| 225            | JX012546 | meta_2_contig00126_6 | Nostoc punctiforme PCC 73102 CG.                 | Cyanobacteria       | 68% |
| 226            | JX012543 | meta_2_contig00064_4 | Myxococcus fulvus HW-1 CCG.                      | Deltaproteobacteria | 76% |
| 227            | JX012507 | meta_3_contig00004_2 | Rhodopirellula baltica SH 1 CCG.                 | Planctomycetes      | 71% |
| 228            | JX012551 | meta_2_contig00102_5 | Rhodopirellula baltica SH 1 CCG.                 | Planctomycetes      | 71% |
| 229            | JX012553 | meta_2_contig00022_4 | Rhodopirellula baltica SH 1 CCG.                 | Deltaproteobacteria | 67% |
| 230            | JX012541 | meta_2_contig00056_6 | Gamma_proteobacterium_HdN1 CG                    | Gammaproteobacteria | 64% |
| 231            | JX012451 | meta_2_contig00136_1 | Anabaena variabilis ATCC 29413 CCG.              | Cyanobacteria       | 61% |
| <b>New PKS</b> |          |                      |                                                  |                     |     |
| 232            | JX012591 | meta_2_contig00115_4 | Nostoc punctiforme PCC 73102 CG.                 | Cyanobacteria       | 53% |
| 233            | JX012578 | meta_2_contig00085_6 | Coralloccoccus_coralloides_DSM_2259 CCG.         | Deltaproteobacteria | 60% |
| 234            | JX012495 | meta_2_contig00252_1 | Coralloccoccus_coralloides_DSM_2259 CCG.         | Deltaproteobacteria | 60% |
| 235            | JX012468 | meta_2_contig00073_1 | Coralloccoccus_coralloides_DSM_2259 CCG.         | Deltaproteobacteria | 59% |
| 236            | JX012427 | meta_1_contig00016_1 | Coralloccoccus_coralloides_DSM_2259 CCG.         | Deltaproteobacteria | 57% |
| 237            | JX012599 | meta_2_contig00078_4 | Coralloccoccus_coralloides_DSM_2259 CCG.         | Deltaproteobacteria | 56% |
| 238            | JX012534 | meta_1_contig00007_6 | Coralloccoccus_coralloides_DSM_2259 CCG.         | Deltaproteobacteria | 60% |
| 239            | JX012505 | meta_2_contig00310_2 | Coralloccoccus_coralloides_DSM_2259 CCG.         | Deltaproteobacteria | 59% |
| 240            | JX012642 | meta_3_contig00050_5 | Coralloccoccus_coralloides_DSM_2259 CCG.         | Deltaproteobacteria | 57% |
| 241            | JX012598 | meta_2_contig00044_4 | Coralloccoccus_coralloides_DSM_2259 CCG.         | Deltaproteobacteria | 57% |

|            |                 |                             |                                                 |                            |            |
|------------|-----------------|-----------------------------|-------------------------------------------------|----------------------------|------------|
| 242        | JX012652        | meta_3_contig00079_6        | Corallocooccus_coralloides_DSM_2259 CCG.        | Deltaproteobacteria        | 58%        |
| 243        | JX012637        | meta_3_contig00036_6        | Corallocooccus_coralloides_DSM_2259 CCG.        | Deltaproteobacteria        | 59%        |
| 244        | JX012589        | meta_2_contig00228_6        | Corallocooccus_coralloides_DSM_2259 CCG.        | Deltaproteobacteria        | 59%        |
| <b>245</b> | <b>JX012603</b> | <b>meta_2_contig00169_4</b> | <b>Corallocooccus_coralloides_DSM_2259 CCG.</b> | <b>Deltaproteobacteria</b> | <b>63%</b> |
| 246        | JX012426        | meta_1_contig00014_1        | Corallocooccus_coralloides_DSM_2259 CCG.        | Deltaproteobacteria        | 58%        |
| <b>247</b> | <b>JX012657</b> | <b>meta_3_contig00104_4</b> | <b>Corallocooccus_coralloides_DSM_2259 CCG.</b> | <b>Deltaproteobacteria</b> | <b>63%</b> |
| 248        | JX012512        | meta_3_contig00032_1        | Corallocooccus_coralloides_DSM_2259 CCG.        | Deltaproteobacteria        | 60%        |
| 249        | JX012593        | meta_2_contig00223_5        | Corallocooccus_coralloides_DSM_2259 CCG.        | Deltaproteobacteria        | 60%        |
| 250        | JX012502        | meta_2_contig00400_1        | Cyanothece sp. PCC 7424 CCG                     | Cyanobacteria              | 55%        |
| 251        | JX012612        | meta_2_contig00239_6        | Corallocooccus_coralloides_DSM_2259 CCG.        | Deltaproteobacteria        | 55%        |
| 252        | JX012516        | meta_3_contig00037_1        | Corallocooccus_coralloides_DSM_2259 CCG.        | Deltaproteobacteria        | 58%        |
| 253        | JX012482        | meta_2_contig00194_1        | Corallocooccus_coralloides_DSM_2259 CCG.        | Deltaproteobacteria        | 56%        |
| 254        | JX012529        | meta_3_contig00070_1        | Corallocooccus_coralloides_DSM_2259 CCG.        | Deltaproteobacteria        | 57%        |
| 255        | JX012607        | meta_2_contig00155_6        | Corallocooccus_coralloides_DSM_2259 CCG.        | Deltaproteobacteria        | 57%        |
| 256        | JX012523        | meta_3_contig00076_1        | Corallocooccus_coralloides_DSM_2259 CCG.        | Deltaproteobacteria        | 60%        |
| 257        | JX012535        | meta_1_contig00009_5        | Corallocooccus_coralloides_DSM_2259 CCG.        | Deltaproteobacteria        | 60%        |
| 258        | JX012647        | meta_3_contig00012_6        | Corallocooccus_coralloides_DSM_2259 CCG.        | Deltaproteobacteria        | 61%        |
| 259        | JX012594        | meta_2_contig00147_6        | Corallocooccus_coralloides_DSM_2259 CCG.        | Deltaproteobacteria        | 61%        |
| 260        | JX012623        | meta_2_contig00354_4        | Corallocooccus_coralloides_DSM_2259 CCG.        | Deltaproteobacteria        | 62%        |
| 261        | JX012476        | meta_2_contig00007_1        | Corallocooccus_coralloides_DSM_2259 CCG.        | Deltaproteobacteria        | 59%        |
| 262        | JX012528        | meta_3_contig00054_3        | Corallocooccus_coralloides_DSM_2259 CCG.        | Deltaproteobacteria        | 61%        |
| 263        | JX012600        | meta_2_contig00105_6        | Corallocooccus_coralloides_DSM_2259 CCG.        | Deltaproteobacteria        | 61%        |
| 264        | JX012648        | meta_3_contig00041_5        | Synechococcus_sp._PCC_7002 CG.                  | Cyanobacteria              | 54%        |
| 265        | JX012641        | meta_3_contig00067_6        | Nostoc sp. PCC 7120 CG.                         | Cyanobacteria              | 53%        |
| 266        | JX012585        | meta_2_contig00144_6        | Bacillus_amyloliquefaciens_LL3 CCG              | Firmicutes                 | 55%        |
| <b>267</b> | <b>JX012463</b> | <b>meta_2_contig00118_1</b> | <b>Corallocooccus_coralloides_DSM_2259 CCG.</b> | <b>Deltaproteobacteria</b> | <b>63%</b> |
| 268        | JX012515        | meta_3_contig00042_1        | Synechococcus_sp._PCC_7002 CCG.                 | Cyanobacteria              | 56%        |
| 269        | JX012514        | meta_3_contig00035_1        | Anabaena_variabilis_ATCC_29413 CCG.             | Cyanobacteria              | 59%        |

|                               |                 |                             |                                                   |                            |            |
|-------------------------------|-----------------|-----------------------------|---------------------------------------------------|----------------------------|------------|
| 270                           | JX012473        | meta_2_contig00133_1        | Coralloccoccus_coralloides_DSM_2259 CCG.          | Deltaproteobacteria        | 58%        |
| 271                           | JX012646        | meta_3_contig00022_6        | Coralloccoccus_coralloides_DSM_2259 CCG.          | Deltaproteobacteria        | 56%        |
| 272                           | JX012580        | meta_2_contig00081_6        | Coralloccoccus_coralloides_DSM_2259 CCG.          | Deltaproteobacteria        | 56%        |
| 273                           | JX012574        | meta_2_contig00066_6        | Coralloccoccus_coralloides_DSM_2259 CCG.          | Deltaproteobacteria        | 59%        |
| 274                           | JX012618        | meta_2_contig00042_4        | Coralloccoccus_coralloides_DSM_2259 CCG.          | Deltaproteobacteria        | 59%        |
| 275                           | JX012624        | meta_2_contig00401_4        | Anabaena variabilis ATCC 29413 clone 7-2 pks gene | Cyanobacteria              | 57%        |
| 276                           | JX012596        | meta_2_contig00187_4        | Synechococcus_sp._PCC_7002 CCG.                   | Cyanobacteria              | 55%        |
| 277                           | JX012469        | meta_2_contig00125_1        | Synechococcus_sp._PCC_7002 CCG.                   | Cyanobacteria              | 56%        |
| 278                           | JX012485        | meta_2_contig00284_1        | Desulfovibrio_alaskensis_G20 CG                   | Deltaproteobacteria        | 52%        |
| 279                           | JX012533        | meta_1_contig00013_6        | Bacillus_amyloliquefaciens_LL3                    | Firmicutes                 | 54%        |
| 280                           | JX012501        | meta_2_contig00391_2        | Desulfovibrio_alaskensis_G20 CG                   | Deltaproteobacteria        | 52%        |
| 281                           | JX012491        | meta_2_contig00266_3        | Anabaena variabilis ATCC 29413 CCG                | Cyanobacteria              | 54%        |
| 282                           | JX012481        | meta_2_contig00070_2        | Synechococcus_sp._PCC_7002 CCG.                   | Cyanobacteria              | 58%        |
| 283                           | JX012649        | meta_3_contig00077_5        | Cyanothece sp. PCC 7424 CCG                       | Cyanobacteria              | 52%        |
| 284                           | JX012605        | meta_2_contig00230_6        | Cyanothece sp. PCC 7424 CCG                       | Cyanobacteria              | 52%        |
| 285                           | JX012477        | meta_2_contig00238_1        | Mycobacterium avium subsp. paratuberculosis CG.   | Actinobacteria             | 58%        |
| <b>286</b>                    | <b>JX012601</b> | <b>meta_2_contig00294_4</b> | <b>Coralloccoccus_coralloides_DSM_2259 CCG.</b>   | <b>Deltaproteobacteria</b> | <b>63%</b> |
| 287                           | JX012616        | meta_2_contig00466_5        | Coralloccoccus_coralloides_DSM_2259 CCG.          | Deltaproteobacteria        | 60%        |
| 288                           | JX012472        | meta_2_contig00220_1        | Coralloccoccus_coralloides_DSM_2259 CCG.          | Deltaproteobacteria        | 60%        |
| 289                           | JX012586        | meta_2_contig00250_6        | Gamma proteobacterium HdN1 CG.                    | Gammaproteobacteria        | 60%        |
| 290                           | JX012450        | meta_2_contig00186_1        | Mycobacterium avium 104 CG.                       | Actinobacteria             | 63%        |
| <b>Cis-AT 2 (light green)</b> |                 |                             |                                                   |                            |            |
| 291                           | AAW84177        | spFKS7Ai_D_dissoluta        | Anabaena variabilis ATCC 29413 CCG                | Cyanobacteria              | 54%        |
| 292                           | JX012579        | meta_2_contig00034_5        | Anabaena variabilis ATCC 29413 CCG                | Cyanobacteria              | 54%        |
| 293                           | JX012650        | meta_3_contig00073_6        | Anabaena variabilis ATCC 29413 CCG.               | Cyanobacteria              | 52%        |
| 294                           | ABK01387        | C_mycofijiensis_cmKS88      | Methylobacterium sp. 4-46 CCG.                    | Alphaproteobacteria        | 57%        |
| 295                           | JX012566        | meta_2_contig00181_6        | Mycobacterium gilvum PYR-GCK CCG.                 | Actinobacteria             | 50%        |
| 296                           | JX012521        | meta_3_contig00075_3        | Gamma_proteobacterium_HdN1 CCG                    | Gammaproteobacteria        | 52%        |

|                                                   |                 |                               |                                               |                       |            |
|---------------------------------------------------|-----------------|-------------------------------|-----------------------------------------------|-----------------------|------------|
| 297                                               | JX012462        | meta_2_contig00065_2          | Herpetosiphon_aurantiacus_DSM_785 CCG.        | Chloroflexi           | 55%        |
| 298                                               | JX012503        | meta_2_contig00197_1          | Herpetosiphon_aurantiacus ATCC 23779 CCG.     | Chloroflexi           | 46%        |
| 299                                               | JX012610        | meta_2_contig00149_4          | Haliangium ochraceum DSM 14365 CG.            | Deltaproteobacteria   | 48%        |
| 300                                               | ABK01384        | C_mycofijiensis_cmKS37        | Stigmatella_aurantiaca_DW4/3-1 CCG            | Deltaproteobacteria   | 56%        |
| 301                                               | JX012552        | meta_2_contig00077_4          | Anabaena_variabilis_ATCC_29413 CG.            | Cyanobacteria         | 63%        |
| 302                                               | JX012441        | meta_2_contig00061_1          | Nostoc sp. PCC 7120 CG                        | Cyanobacteria         | 61%        |
| 303                                               | JX012633        | meta_3_contig00058_6          | Burkholderia_ambifaria_AMMD CCG.              | Betaproteobacteria    | 64%        |
| 304                                               | JX012433        | meta_2_contig00173_1          | Anabaena_variabilis ATCC 29413 CCG            | Cyanobacteria         | 73%        |
| 305                                               | JX012432        | meta_2_contig00063_1          | Anabaena_variabilis ATCC 29413 CCG            | Cyanobacteria         | 63%        |
| 306                                               | JX012628        | meta_3_contig00011_6          | Bacillus_amyloliquefaciens_LL3 CCG            | Firmicutes            | 62%        |
| 307                                               | JX012632        | meta_3_contig00068_6          | Myxococcus_fulvus_HW-1 CCG.                   | Deltaproteobacteria   | 69%        |
| 308                                               | JX012518        | meta_3_contig00047_2          | Burkholderia_ambifaria_AMMD chromosome 3 CS   | Betaproteobacteria    | 61%        |
| 309                                               | ABK01389        | C_mycofijiensis_cmKSA46       | Anabaena_variabilis ATCC 29413 CCG.           | Cyanobacteria         | 68%        |
| 310                                               | ABI34077        | S_costatum_H_perleve          | Cyanothece_sp._PCC_7424 CG                    | Cyanobacteria         | 63%        |
| <b>311</b>                                        | <b>ADN37740</b> | <b>A_queenslandica</b>        | <b>Mycobacterium vanbaalenii PYR-1 CCG.</b>   | <b>Actinobacteria</b> | <b>93%</b> |
| 312                                               | JX012454        | meta_2_contig00216_3          | Stigmatella_aurantiaca_DW4/3-1 CCG            | Deltaproteobacteria   | 67%        |
| 313                                               | JX012547        | meta_2_contig00159_6          | Streptomyces_griseus_subsp._griseus CG        | Actinobacteria        | 67%        |
| 314                                               | ABK01385        | C_mycofijiensis_cmKS68        | Stigmatella_aurantiaca_DW4/3-1 CCG            | Deltaproteobacteria   | 63%        |
| 315                                               | JX012581        | meta_2_contig00233_6          | Stigmatella_aurantiaca_DW4/3-1 CCG            | Deltaproteobacteria   | 67%        |
| 316                                               | JX012517        | meta_3_contig00078_3          | Stigmatella_aurantiaca_DW4/3-1 CCG            | Deltaproteobacteria   | 62%        |
| 317                                               | CAO98852        | <b>Aufl</b>                   | Stigmatella_aurantiaca_DW4/3-1 chromosome, CG | Deltaproteobacteria   | 91%        |
| 318                                               | JX012449        | meta_2_contig00052_1          | Haliangium ochraceum DSM 14365 CG.            | Deltaproteobacteria   | 61%        |
| 319                                               | JX012532        | meta_1_contig00004_6          | Stigmatella_aurantiaca_DW4/3-1                | Deltaproteobacteria   | 64%        |
| 320                                               | JX012531        | meta_1_contig00006_6          | Stigmatella_aurantiaca_DW4/3-1 CG.            | Deltaproteobacteria   | 64%        |
| <b>Polysaccharide related FAS-like type I PKS</b> |                 |                               |                                               |                       |            |
| 321                                               | ADY17925        | Pseudovibrio_Ad2_A_dissimilis | Pseudovibrio_sp._FO-BEG1                      | Alphaproteobacteria   | 91%        |
| 322                                               | ADY17924        | Pseudovibrio_Ad2_A_dissimilis | Pseudovibrio_sp._FO-BEG1                      | Alphaproteobacteria   | 92%        |

|            |                 |                                |                                             |                            |            |
|------------|-----------------|--------------------------------|---------------------------------------------|----------------------------|------------|
| 323        | ADY17927        | Pseudovibrio_Ad9_A_dissimilis  | Pseudovibrio_sp._FO-BEG1                    | Alphaproteobacteria        | 96%        |
| 324        | ADY17932        | Pseudovibrio_Ad26_A_dissimilis | Pseudovibrio_sp._FO-BEG1                    | Alphaproteobacteria        | 95%        |
| 325        | ADY17930        | Pseudovibrio_Ad23_A_dissimilis | Pseudovibrio_sp._FO-BEG1                    | Alphaproteobacteria        | 96%        |
| 326        | ACI32870        | FAS_Pseudovibrio_H_simulans    | Pseudovibrio_sp._FO-BEG1                    | Alphaproteobacteria        | 96%        |
| 327        | ADY17940        | PseudovibAd48_A_dissimilis     | Pseudovibrio_sp._FO-BEG1                    | Alphaproteobacteria        | 95%        |
| 328        | ACI32869        | FAS_Pseudovibrio_H_simulans    | Pseudovibrio_sp._FO-BEG1                    | Alphaproteobacteria        | 95%        |
| 329        | ADY17936        | Pseudovibrio_Ad35_A_dissimilis | Pseudovibrio_sp._FO-BEG1                    | Alphaproteobacteria        | 96%        |
| 330        | ADY17934        | Pseudovibrio_Ad28_A_dissimilis | Pseudovibrio_sp._FO-BEG1                    | Alphaproteobacteria        | 96%        |
| 331        | ADY17938        | PseudovibAd37_A_dissimilis     | Pseudovibrio_sp._FO-BEG1                    | Alphaproteobacteria        | 95%        |
| 332        | ADY17928        | Pseudovibrio_Ad11_A_dissimilis | Pseudovibrio_sp._FO-BEG1                    | Alphaproteobacteria        | 94%        |
| 333        | ADY17929        | Pseudovibrio_Ad17_A_dissimilis | Pseudovibrio_sp._FO-BEG1                    | Alphaproteobacteria        | 95%        |
| 334        | ADY17935        | Pseudovibrio_Ad30_A_dissimilis | Pseudovibrio_sp._FO-BEG1                    | Alphaproteobacteria        | 96%        |
| <b>335</b> | <b>ABK01380</b> | <b>C_mycofijiensis_cmKS17</b>  | <b>Pseudovibrio_sp._FO-BEG1</b>             | <b>Alphaproteobacteria</b> | <b>84%</b> |
| 336        | AAW78650        | <b>RkpA_KS2</b>                | Sinorhizobium fredii HH103 CCG.             | Alphaproteobacteria        | 90%        |
| 337        | JX012504        | meta_2_contig00243_2           | Sinorhizobium medicae WSM419 CCG.           | Alphaproteobacteria        | 56%        |
| 338        | JX012620        | meta_2_contig00179_6           | Sinorhizobium medicae WSM419 CCG.           | Alphaproteobacteria        | 57%        |
| 339        | JX012655        | meta_3_contig00014_6           | Sinorhizobium fredii NGR234 CCG.            | Alphaproteobacteria        | 55%        |
| 340        | JX012654        | meta_3_contig00027_6           | Azorhizobium caulinodans ORS 571 CG.        | Alphaproteobacteria        | 53%        |
| 341        | JX012530        | meta_3_contig00013_1           | Sinorhizobium_meliloti_SM11 CG              | Alphaproteobacteria        | 48%        |
| 342        | JX012602        | meta_2_contig00166_6           | Pseudovibrio_sp._FO-BEG1                    | Alphaproteobacteria        | 57%        |
| 343        | JX012625        | meta_2_contig00313_5           | Pseudovibrio_sp._FO-BEG1                    | Alphaproteobacteria        | 62%        |
| 344        | JX012592        | meta_2_contig00051_6           | Nocardia farcinica IFM 10152 CCG.           | Actinobacteria             | 48%        |
| 345        | JX012428        | meta_1_contig00008_3           | Legionella longbeachae NSW150 CCG           | Gammaproteobacteria        | 45%        |
| 346        | ACB47226        | Phakellia_fusca                | Segniliparus rotundus DSM 44985 CCG.        | Actinobacteria             | 48%        |
| 347        | JX012484        | meta_2_contig00148_3           | Mycobacterium_avium_subsp._paratuberculosis | Actinobacteria             | 54%        |
| 348        | ABI34079        | Karlodinium_NBA5_H_perleve     | Xanthobacter_autotrophicus_Py2              | Alphaproteobacteria        | 59%        |
| 349        | AAW84195        | spTKS37Ai_D_dissoluta          | Streptomyces_bingchenggensis_BCW-1          | Actinobacteria             | 53%        |
| 350        | ABK01333        | C_mycofijiensis_cmKS7          | Legionella longbeachae NSW150 CCG.          | Gammaproteobacteria        | 63%        |

|                 |                 |                             |                                               |                       |            |
|-----------------|-----------------|-----------------------------|-----------------------------------------------|-----------------------|------------|
| 351             | AAW84194        | spTKS35i_D_dissoluta        | Frateruia_aurantia_DSM_6220                   | Gammaproteobacteria   | 66%        |
| 352             | B1HAZ6          | <b>BURPS_WcbR_KS</b>        | Burkholderia_mallei_ATCC_23344                | Betaproteobacteria    | 100%       |
| 353             | Q82UT4          | <b>NITEU_WcbR_KS</b>        | Nitrosomonas_europaea_ATCC_19718_CG.          | Betaproteobacteria    | 99%        |
| 354             | JX012571        | meta_2_contig00029_6        | Clostridium_acetobutylicum_EA_2018            | Firmicutes            | 58%        |
| 355             | ABG57047        | Pseudoalteromonas_H_perleve | Saccharophagus_degradans_2-40_CCG.            | Gammaproteobacteria   | 68%        |
| 356             | JX012559        | meta_2_contig00023_6        | Paenibacillus_mucilaginosus_K02               | Firmicutes            | 65%        |
| 357             | JX012453        | meta_2_contig00174_1        | Paenibacillus_mucilaginosus_K02               | Firmicutes            | 60%        |
| <b>358</b>      | <b>JX012576</b> | <b>meta_2_contig00237_4</b> | <b>Rhodopirellula_baltica_SH_1_CCG</b>        | <b>Planctomycetes</b> | <b>80%</b> |
| 359             | AAW84208        | spTKS25Ci_D_dissoluta       | Rhodopirellula_baltica_SH_1_CCG               | Planctomycetes        | 75%        |
| 360             | JX012557        | meta_2_contig00106_5        | Rhodopirellula_baltica_SH_1_CCG.              | Planctomycetes        | 65%        |
| 361             | ABK01401        | A_aerophoba_2m14            | Burkholderia_ambifaria_AMMD                   | Betaproteobacteria    | 62%        |
| 362             | AAW84192        | spTKS63g_D_dissoluta        | Burkholderia_ambifaria_AMMD                   | Betaproteobacteria    | 60%        |
| 363             | AAQ91800        | AAQ91800                    | Paenibacillus_curdlanolyticus_YK9_ctg108_WGSS | Firmicutes            | 64%        |
| <b>Trans-AT</b> |                 |                             |                                               |                       |            |
| 364             | JX012639        | meta_3_contig00045_6        | Paenibacillus_polymyxa_SC2_CCG                | Firmicutes            | 71%        |
| 365             | ABK51301        | <b>BryKS8</b>               | Paenibacillus_polymyxa_ATCC_842_contig26_WGSS | Firmicutes            | 76%        |
| 366             | JX012604        | meta_2_contig00178_4        | Paenibacillus_polymyxa_SC2_CCG                | Firmicutes            | 81%        |
| 367             | JX012575        | meta_2_contig00087_6        | Paenibacillus_polymyxa_E681_CCG.              | Firmicutes            | 77%        |
| 368             | JX012640        | meta_3_contig00064_6        | Dickeya_dadantii_Ech703_CCG                   | Gammaproteobacteria   | 77%        |
| 369             | JX012487        | meta_2_contig00130_3        | Paenibacillus_polymyxa_M1                     | Firmicutes            | 64%        |
| 370             | JX012588        | meta_2_contig00160_6        | Dickeya_dadantii_Ech703_CCG                   | Gammaproteobacteria   | 64%        |
| 371             | AAW84173        | spFKS44i_D_dissoluta        | Paenibacillus_polymyxa_M1                     | Firmicutes            | 71%        |
| 372             | JX012480        | meta_2_contig00236_2        | Paenibacillus_polymyxa_E681_CCG               | Firmicutes            | 65%        |
| 373             | JX012425        | meta_1_contig00011_1        | Paenibacillus_polymyxa_SC2_CCG.               | Firmicutes            | 68%        |
| 374             | JX012467        | meta_2_contig00199_1        | Paenibacillus_polymyxa_SC2_CCG                | Firmicutes            | 69%        |
| 375             | JX012452        | meta_2_contig00101_1        | Paenibacillus_polymyxa_E681                   | Firmicutes            | 61%        |
| 376             | JX012587        | meta_2_contig00091_4        | Dickeya_dadantii_Ech703_CCG                   | Gammaproteobacteria   | 64%        |
| 377             | JX012562        | meta_2_contig00165_6        | Paenibacillus_polymyxa_SC2_CCG                | Firmicutes            | 67%        |

|     |          |                                |                                                |                     |      |
|-----|----------|--------------------------------|------------------------------------------------|---------------------|------|
| 378 | JX012570 | meta_2_contig00142_6           | Paenibacillus polymyxa E681 CCG                | Firmicutes          | 66%  |
| 379 | JX012577 | meta_2_contig00036_6           | Paenibacillus polymyxa E681 CCG                | Firmicutes          | 60%  |
| 380 | JX012460 | meta_2_contig00190_1           | Myxococcus xanthus DK 1622 CCG                 | Deltaproteobacteria | 53%  |
| 381 | AAQ91801 | AAQ91801                       | Paenibacillus_polymyxa_M1 CG                   | Firmicutes          | 63%  |
| 382 | JX012461 | meta_2_contig00083_1           | Myxococcus_xanthus_DK_1622                     | Deltaproteobacteria | 63%  |
| 383 | JX012645 | meta_3_contig00072_6           | Paenibacillus_polymyxa_M1                      | Firmicutes          | 65%  |
| 384 | JX012489 | meta_2_contig00248_3           | Burkholderia_gladioli_BSR3                     | Betaproteobacteria  | 55%  |
| 385 | JX012479 | meta_2_contig00232_1           | Chitinophaga pinensis DSM 2588 CG              | Bacteroidetes       | 56%  |
| 386 | JX012583 | meta_2_contig00217_6           | Bacillus_amyloliquefaciens_subsp._plantarum    | Firmicutes          | 77%  |
| 387 | JX012563 | meta_2_contig00131_6           | Chitinophaga pinensis DSM 2588 CG              | Bacteroidetes       | 78%  |
| 388 | JX012459 | meta_2_contig00116_1           | Sorangium_cellulosum_'So_ce_56' CG             | Deltaproteobacteria | 74%  |
| 389 | JX012478 | meta_2_contig00129_1           | Paenibacillus_mucilaginosus_K02 CCG            | Firmicutes          | 70%  |
| 390 | JX012568 | meta_2_contig00111_6           | Bacillus_amyloliquefaciens_subsp._plantarum CG | Firmicutes          | 67%  |
| 391 | JX012471 | meta_2_contig00092_1           | Paenibacillus_mucilaginosus_K02 CCG.           | Firmicutes          | 74%  |
| 392 | JX012525 | meta_3_contig00016_2           | Paenibacillus_mucilaginosus_K02                | Firmicutes          | 68%  |
| 393 | JX012564 | meta_2_contig00079_6           | Burkholderia gladioli BSR3 chromosome 1 CS     | Betaproteobacteria  | 72%  |
| 394 | AEA60792 | PKS_NRPS_Burkholderia_gladioli | Burkholderia_gladioli                          | Betaproteobacteria  | 100% |
| 395 | AAW84171 | spFKS39i_D_dissoluta           | Brevibacillus brevis NBRC 100599 CG.           | Firmicutes          | 70%  |
| 396 | JX012522 | meta_3_contig00061_2           | Burkholderia gladioli BSR3 chromosome 1 CS     | Betaproteobacteria  | 62%  |
| 397 | JX012567 | meta_2_contig00138_6           | Burkholderia gladioli BSR3 chromosome 1 CS     | Betaproteobacteria  | 63%  |
| 398 | JX012458 | meta_2_contig00112_1           | Burkholderia gladioli BSR3 chromosome 1 CS     | Betaproteobacteria  | 61%  |
| 399 | JX012526 | meta_3_contig00051_1           | Paenibacillus polymyxa E681 CCG.               | Firmicutes          | 62%  |
| 400 | JX012497 | meta_2_contig00103_1           | Paenibacillus polymyxa E681 CCG.               | Firmicutes          | 56%  |
| 401 | AAW84198 | spTKS31Bi_D_dissoluta          | Paenibacillus polymyxa E681 CCG                | Firmicutes          | 56%  |
| 402 | JX012565 | meta_2_contig00134_6           | Paenibacillus_polymyxa_E681 CCG.               | Firmicutes          | 79%  |
| 403 | JX012608 | meta_2_contig00262_6           | Ralstonia_solanacearum_CFBP2957 CG.            | Betaproteobacteria  | 71%  |
| 404 | JX012611 | meta_2_contig00246_6           | Pseudomonas fluorescens Pf-5 CCG.              | Gammaproteobacteria | 70%  |
| 405 | JX012597 | meta_2_contig00242_4           | Burkholderia_rhizoxinica_HKI_454               | Betaproteobacteria  | 70%  |

|            |                 |                                |                                             |                       |            |
|------------|-----------------|--------------------------------|---------------------------------------------|-----------------------|------------|
| 406        | JX012466        | meta_2_contig00213_1           | Ralstonia solanacearum PSI07 megaplasmid CS | Betaproteobacteria    | 70%        |
| 407        | AAW84217        | fosFJ8KS38_D_dissoluta         | Ralstonia_solanacearum_CFBP2957             | Gammaproteobacteria   | 71%        |
| 408        | JX012465        | meta_2_contig00218_1           | Ralstonia_solanacearum_CFBP2957             | Betaproteobacteria    | 71%        |
| 409        | JX012582        | meta_2_contig00211_6           | Ralstonia_solanacearum_CFBP2957             | Betaproteobacteria    | 70%        |
| 410        | ZP_02371244     | <b>TaiKS2</b>                  | Burkholderia thailandensis, WGSS            | Betaproteobacteria    | 100%       |
| 411        | YP_439868       | YP_439868                      | Burkholderia thailandensis E264             | Betaproteobacteria    | 100%       |
| 412        | JX012644        | meta_3_contig00056_5           | Mycobacterium_vanbaalenii_PYR-1             | Actinobacteria        | 51%        |
| 413        | JX012511        | meta_3_contig00019_1           | Myxococcus xanthus DK 1622 CCG.             | Deltaproteobacteria   | 77%        |
| 414        | JX012595        | meta_2_contig00226_4           | Myxococcus xanthus DK 1622 CCG.             | Deltaproteobacteria   | 76%        |
| 415        | ACB47225        | Berenicea_ampulliformis        | Paenibacillus polymyxa E681 CCG.            | Firmicutes            | 70%        |
| 416        | JX012524        | meta_3_contig00049_2           | Dickeya_dadantii_Ech703                     | Gammaproteobacteria   | 69%        |
| 417        | JX012584        | meta_2_contig00072_6           | Dickeya_dadantii_Ech703                     | Gammaproteobacteria   | 69%        |
| 418        | ABB73272        | P_clavata_Bacillus_M118        | Streptomyces_scabiei_87.22 CG               | Actinobacteria        | 85%        |
| <b>419</b> | <b>ABB73271</b> | <b>P_clavata_Bacillus_M115</b> | <b>Streptomyces_scabiei_87.22 CG</b>        | <b>Actinobacteria</b> | <b>86%</b> |
| 420        | ABB73270        | P_clavata_Bacillus_SW21        | Streptomyces_scabiei_87.22 CG               | Actinobacteria        | 85%        |
| 421        | JX012636        | meta_3_contig00017_5           | Paenibacillus_polymyxa_M1 CG                | Firmicutes            | 71%        |
| 422        | JX012490        | meta_2_contig00209_2           | Paenibacillus_polymyxa_M1 CG                | Firmicutes            | 67%        |
| 423        | JX012457        | meta_2_contig00060_1           | Paenibacillus_polymyxa_M1 CG                | Firmicutes            | 70%        |
| 424        | JX012510        | meta_3_contig00020_1           | Bacillus amyloliquefaciens FZB42 CG.        | Firmicutes            | 63%        |
| 425        | JX012560        | meta_2_contig00075_6           | Teredinibacter_turnerae_T7901               | Gammaproteobacteria   | 60%        |
| 426        | AAS47564        | <b>PedKS4</b>                  | Myxococcus_xanthus_DK_1622 CCG              | Deltaproteobacteria   | 65%        |
| 427        | AAV97870        | <b>OnnKS1</b>                  | Burkholderia_gladioli_BSR3 CCG              | Betaproteobacteria    | 57%        |
| 428        | AAQ91798        | AAQ91798                       | Burkholderia_gladioli_BSR3 CCG              | Betaproteobacteria    | 57%        |
| 429        | JX012572        | meta_2_contig00045_4           | Sorangium_cellulosum_'So_ce_56'             | Deltaproteobacteria   | 54%        |
| 430        | JX012527        | meta_3_contig00052_1           | Chitinophaga pinensis DSM 2588 CG.          | Bacteroidetes         | 53%        |
| 431        | JX012643        | meta_3_contig00029_6           | Chitinophaga pinensis DSM 2588 CG.          | Bacteroidetes         | 53%        |
| 432        | JX012651        | meta_3_contig00048_6           | Bacillus_subtilis_subsp._spizizenii         | Firmicutes            | 57%        |
| 433        | JX012617        | meta_2_contig00203_6           | Sorangium_cellulosum_'So_ce_56' CCG         | Deltaproteobacteria   | 58%        |



|                 |              |                             |                                                  |                     |      |
|-----------------|--------------|-----------------------------|--------------------------------------------------|---------------------|------|
| 434             | YP_004029397 | <b>RhiKS4</b>               | Burkholderia_rhizoxinica_HKI_454                 | Betaproteobacteria  | 96%  |
| 435             | YP_004029397 | Burkholderia rhizoxinica    | Burkholderia_rhizoxinica_HKI_455                 | Betaproteobacteria  | 96%  |
| 436             | JX012613     | meta_2_contig00251_4        | Pseudomonas fluorescens Pf-5 CCG.                | Gammaproteobacteria | 56%  |
| 437             | JX012609     | meta_2_contig00222_6        | Bacillus_amyloliquefaciens_subsp._plantarum      | Firmicutes          | 61%  |
| 438             | JX012488     | meta_2_contig00139_1        | Clostridium cellulolyticum H10 CG.               | Firmicutes          | 62%  |
| 439             | JX012520     | meta_3_contig00030_1        | Clostridium cellulolyticum H10 CG.               | Firmicutes          | 62%  |
| 440             | ZP_04523236  | _Burkholderia               | Burkholderia_mallei_ATCC_23344                   | Betaproteobacteria  | 84%  |
| 441             | ABK51301     | <b>BryKS11</b>              | Clostridium_cellulolyticum_H10                   | Firmicutes          | 52%  |
| 442             | YP_439860    | <b>TaiKS9</b>               | Burkholderia thailandensis, WGSS                 | Betaproteobacteria  | 100% |
| 443             | YP_004360747 | YP_004360747                | Burkholderia gladioli BSR3                       | Betaproteobacteria  | 91%  |
| 444             | AAM12911     | AAM12911                    | Paenibacillus_polymyxa_E681                      | Firmicutes          | 69%  |
| 445             | ADI59533     | <b>CorKS8_Deltaproteo</b>   | Streptomyces_cattleya_NRRL_8057                  | Actinobacteria      | 54%  |
| 446             | ABK01379     | C_mycofijiensis_cmKS12      | Clostridium_clariflavum_DSM_19732 CCG            | Firmicutes          | 56%  |
| <b>PKS/NRPS</b> |              |                             |                                                  |                     |      |
| 447             | JX012653     | meta_3_contig00001_6        | Paenibacillus mucilaginosus K02 CCG              | Firmicutes          | 62%  |
| 448             | AAW84207     | spTKS19Ci_D_dissoluta       | Paenibacillus_mucilaginosus_K02                  | Firmicutes          | 66%  |
| 449             | JX012496     | meta_2_contig00093_1        | Paenibacillus_mucilaginosus_K03                  | Firmicutes          | 65%  |
| 450             | JX012622     | meta_2_contig00153_5        | Photorhabdus asymbiotica subsp. asymbiotica CCG  | Gammaproteobacteria | 67%  |
| 451             | AAW84221     | fosFJ132KS34_D_dissoluta    | Cyanothece sp. ATCC 51142 chromosome circular CS | Cyanobacteria       | 71%  |
| 452             | JX012606     | meta_2_contig00008_6        | Acaryochloris marina MBIC11017 plasmid pREB1 CS  | Cyanobacteria       | 72%  |
| 453             | ABK01394     | C_mycofijiensis_cmKSH71     | Paenibacillus_mucilaginosus_3016                 | Firmicutes          | 63%  |
| 454             | ABK01386     | C_mycofijiensis_cmKS79      | Anabaena variabilis ATCC 29413 CCG               | Cyanobacteria       | 66%  |
| 455             | JX012499     | meta_2_contig00253_1        | Myxococcus fulvus_HW-1 CCG                       | Deltaproteobacteria | 79%  |
| 456             | JX012486     | meta_2_contig00122_1        | Trichodesmium_erythraeum_IMS101                  | Cyanobacteria       | 71%  |
| 457             | ABK01391     | C_mycofijiensis_cmKSA81     | Trichodesmium_erythraeum_IMS101                  | Cyanobacteria       | 62%  |
| 458             | JX012483     | meta_2_contig00009_1        | Paenibacillus_mucilaginosus_K02 CG               | Firmicutes          | 68%  |
| 459             | AAS98784     | <b>JamM_Cyanob_NRPS_PKS</b> | Anabaena_variabilis_ATCC_29413 CCG               | Cyanobacteria       | 74%  |
| 460             | JX012614     | meta_2_contig00037_4        | Paenibacillus_mucilaginosus_K02 CCG              | Firmicutes          | 68%  |

|            |                 |                                |                                                  |                            |            |
|------------|-----------------|--------------------------------|--------------------------------------------------|----------------------------|------------|
| 461        | JX012474        | meta_2_contig00012_1           | Acaryochloris_marina_MBIC11017                   | Cyanobacteria              | 65%        |
| 462        | JX012656        | meta_3_contig00003_5           | Burkholderia phymatum STM815 chromosome 1 CS     | Betaproteobacteria         | 59%        |
| <b>463</b> | <b>JX012498</b> | <b>meta_2_contig00109_1</b>    | <b>Agrobacterium vitis S4 plasmid pAtS4e CS</b>  | <b>Alphaproteobacteria</b> | <b>82%</b> |
| 464        | JX012493        | meta_2_contig00011_2           | Nostoc punctiforme PCC 73102 CG                  | Cyanobacteria              | 65%        |
| 465        | JX012492        | meta_2_contig00067_1           | Nostoc_punctiforme_PCC_73102 CG                  | Cyanobacteria              | 61%        |
| 466        | JX012494        | meta_2_contig00010_2           | Nostoc punctiforme PCC 73102 CG                  | Cyanobacteria              | 64%        |
| 467        | ACB47224        | H_perlevis                     | Nostoc punctiforme PCC 73102 CG                  | Cyanobacteria              | 65%        |
| 468        | JX012500        | meta_2_contig00137_1           | Acaryochloris_marina_MBIC11017                   | Cyanobacteria              | 62%        |
| 469        | JX012615        | meta_2_contig00006_4           | Paenibacillus mucilaginosus K02 CCG              | Firmicutes                 | 70%        |
| 470        | JX012590        | meta_2_contig00013_6           | Myxococcus_fulvus_HW-1                           | Deltaproteobacteria        | 67%        |
| 471        | JX012621        | meta_2_contig00039_4           | Xanthobacter_autotrophicus_Py2 CCG               | Alphaproteobacteria        | 64%        |
| 472        | AAW84203        | spTKS10Ci_D_dissoluta          | Paenibacillus_mucilaginosus_K02                  | Firmicutes                 | 55%        |
| 473        | JX012519        | meta_3_contig00002_1           | Paenibacillus_mucilaginosus_K03                  | Firmicutes                 | 56%        |
| 474        | JX012470        | meta_2_contig00017_1           | Nostoc punctiforme PCC 73102 CG.                 | Cyanobacteria              | 61%        |
| 475        | JX012475        | meta_2_contig00014_1           | Myxococcus_fulvus_HW-1 CCG                       | Deltaproteobacteria        | 63%        |
| 476        | AAW84170        | spFKS32i_D_dissoluta           | Cyanothece sp. ATCC 51142 chromosome circular CS | Cyanobacteria              | 71%        |
| 477        | ADY17941        | PseudovibHs3_H_simulans        | Pseudomonas syringae pv. syringae B728a CG       | Gammaproteobacteria        | 69%        |
| 478        | ADY17931        | Pseudovibrio_Ad23_A_dissimilis | Pseudomonas syringae pv. syringae B728a CG.      | Gammaproteobacteria        | 69%        |
| 479        | ADY17939        | PseudovibAd48_A_dissimilis     | Pseudomonas fluorescens Pf0-1 CCG.               | Gammaproteobacteria        | 68%        |
| 480        | ACI32873        | FAS_Pseudovibrio_H_simulans    | Pseudomonas syringae pv. syringae B728a CG.      | Gammaproteobacteria        | 68%        |
| 481        | ADY17933        | Pseudovibrio_Ad28_A_dissimilis | Pseudomonas syringae pv. syringae B728a CG.      | Gammaproteobacteria        | 68%        |
| 482        | ACI32872        | FAS_Pseudovibrio_H_simulans    | Pseudomonas fluorescens Pf0-1 CCG                | Gammaproteobacteria        | 67%        |
| 483        | ADY17926        | Pseudovibrio_Ad8_A_dissimilis  | Pseudomonas fluorescens Pf0-1 CCG.               | Gammaproteobacteria        | 68%        |
| 484        | ACI32871        | FAS_Pseudovibrio_H_simulans    | Pseudomonas fluorescens Pf0-1 CCG.               | Gammaproteobacteria        | 68%        |
| 485        | ADY17937        | Pseudovibrio_Ad35_A_dissimilis | Pseudomonas fluorescens Pf0-1 CCG.               | Gammaproteobacteria        | 67%        |
| 486        | ABG57048        | Pseudoalteromonas_H_perleve    | Delftia_sp._Cs1-4 CCG                            | Betaproteobacteria         | 63%        |
| 487        | ABK01395        | C_mycofijiensis_cmKSH79        | Paenibacillus mucilaginosus K02 CCG              | Firmicutes                 | 60%        |
| 488        | ABK01393        | C_mycofijiensis_cmKSH23        | Myxococcus_fulvus_HW-1 CCG                       | Deltaproteobacteria        | 60%        |

|                 |                 |                                           |                                                |                           |            |
|-----------------|-----------------|-------------------------------------------|------------------------------------------------|---------------------------|------------|
| 489             | ZP_02371233     | <b>TaiKS5</b>                             | Burkholderia_thailandensis_E264                | Betaproteobacteria        | 100%       |
| 490             | AAV97877        | <b>OnnKS5</b>                             | Paenibacillus_polymyxa_E681                    | Firmicutes                | 68%        |
| <b>Outgroup</b> |                 |                                           |                                                |                           |            |
| 491             | BAI44079        | Streptomyces_H_simulans                   | Streptomyces_scabiei_87.22 CCG                 | Actinobacteria            | 85%        |
| 492             | BAI44075        | Streptomyces_H_simulans                   | Streptomyces_scabiei_87.22 CCG                 | Actinobacteria            | 85%        |
| 493             | BAI44077        | Streptomyces_H_simulans                   | Streptomyces_scabiei_87.22 CCG                 | Actinobacteria            | 86%        |
| 494             | ABP57802        | Streptomyces_dendra                       | Streptomyces_hygrosopicus_subsp._jinggangensis | Actinobacteria            | 84%        |
| 495             | BAI44069        | Streptomyces_H_simulans                   | treptomyces_hygrosopicus_subsp._jinggangensis  | Actinobacteria            | 91%        |
| 496             | BAI44072        | Streptomyces_H_simulans                   | Streptomyces_flavogriseus_ATCC_33331           | Actinobacteria            | 72%        |
| 497             | BAI44071        | Streptomyces_H_simulans                   | Streptomyces_flavogriseus_ATCC_33331           | Actinobacteria            | 85%        |
| 498             | ACG50689        | Streptomyces_sp_PKSII                     | Streptomyces_sp._SirexAA-E CCG                 | Actinobacteria            | 65%        |
| 499             | ABQ42685        | typeII_Streptomyces13_42_Iotrochota       | Streptomyces_sp._SirexAA-E CCG                 | Actinobacteria            | 77%        |
| 500             | BAI44073        | Streptomyces_H_simulans                   | Streptomyces sp. SirexAA-E CCG                 | Actinobacteria            | 75%        |
| 501             | ACV31767        | Streptomyces_sp._MAD01                    | Streptomyces sp. SirexAA-E CCG                 | Actinobacteria            | 72%        |
| 502             | NP_629237       | ActI_ORF1_Streptomyces                    | Streptomyces_coelicolor_A3 CCG                 | Actinobacteria            | 99%        |
| 503             | ABO33015        | typeII_ks_Micromonospora_H_simulans       | Streptosporangium_roseum_DSM_43021             | Actinobacteria            | 75%        |
| 504             | BAI44070        | Streptomyces_H_simulans                   | Streptomyces sp. SirexAA-E CCG                 | Actinobacteria            | 78%        |
| 505             | BAI44076        | Streptomyces_H_simulans                   | Salinispora tropica CNB-440 CCG.               | Actinobacteria            | 71%        |
| 506             | BAI44078        | Streptomyces_H_simulans                   | Saccharomonospora viridis DSM 43017 CCG.       | Actinobacteria            | 72%        |
| 507             | BAI44074        | Streptomyces_H_simulans                   | Saccharomonospora viridis DSM 43017 CCG.       | Actinobacteria            | 71%        |
| <b>508</b>      | <b>JX945643</b> | <b>contig00144_6_KSRegion_(KSA)_468aa</b> | <b>Aromatoleum_aromaticum_EbN1 CCG</b>         | <b>Betaproteobacteria</b> | <b>63%</b> |
